# Supplementary material for: Metrology of solar spectral irradiance at the top of the atmosphere in the near infrared measured at Mauna Loa Observatory: the PYR-ILIOS campaign
Source: Copernicus journal article supplement (doi:10.5194/amt-11-6605-2018), 2018-12-14
Supplement: Supplementary file 1 [file amt-11-6605-2018-supplement.zip]

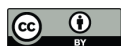

## *Supplement of*

# **Metrology of solar spectral irradiance at the top of the atmosphere in the near infrared measured at Mauna Loa Observatory: the PYR-ILIOS campaign**

**Nuno Pereira et al.**

*Correspondence to:* Nuno Pereira ([nuno.pereira@aeronomie.be](mailto:nuno.pereira@aeronomie.be))

- [amt-11-6605-2018-supplement-title-page.pdf](#)
- [depointing.png](#)

The copyright of individual parts of the supplement might differ from the CC BY 4.0 License.
