# Supplementary figures and images for: Metrology of solar spectral irradiance at the top of the atmosphere in the near infrared measured at Mauna Loa Observatory: the PYR-ILIOS campaign
Source: Copernicus journal article supplement (doi:10.5194/amt-11-6605-2018), 2018-12-14

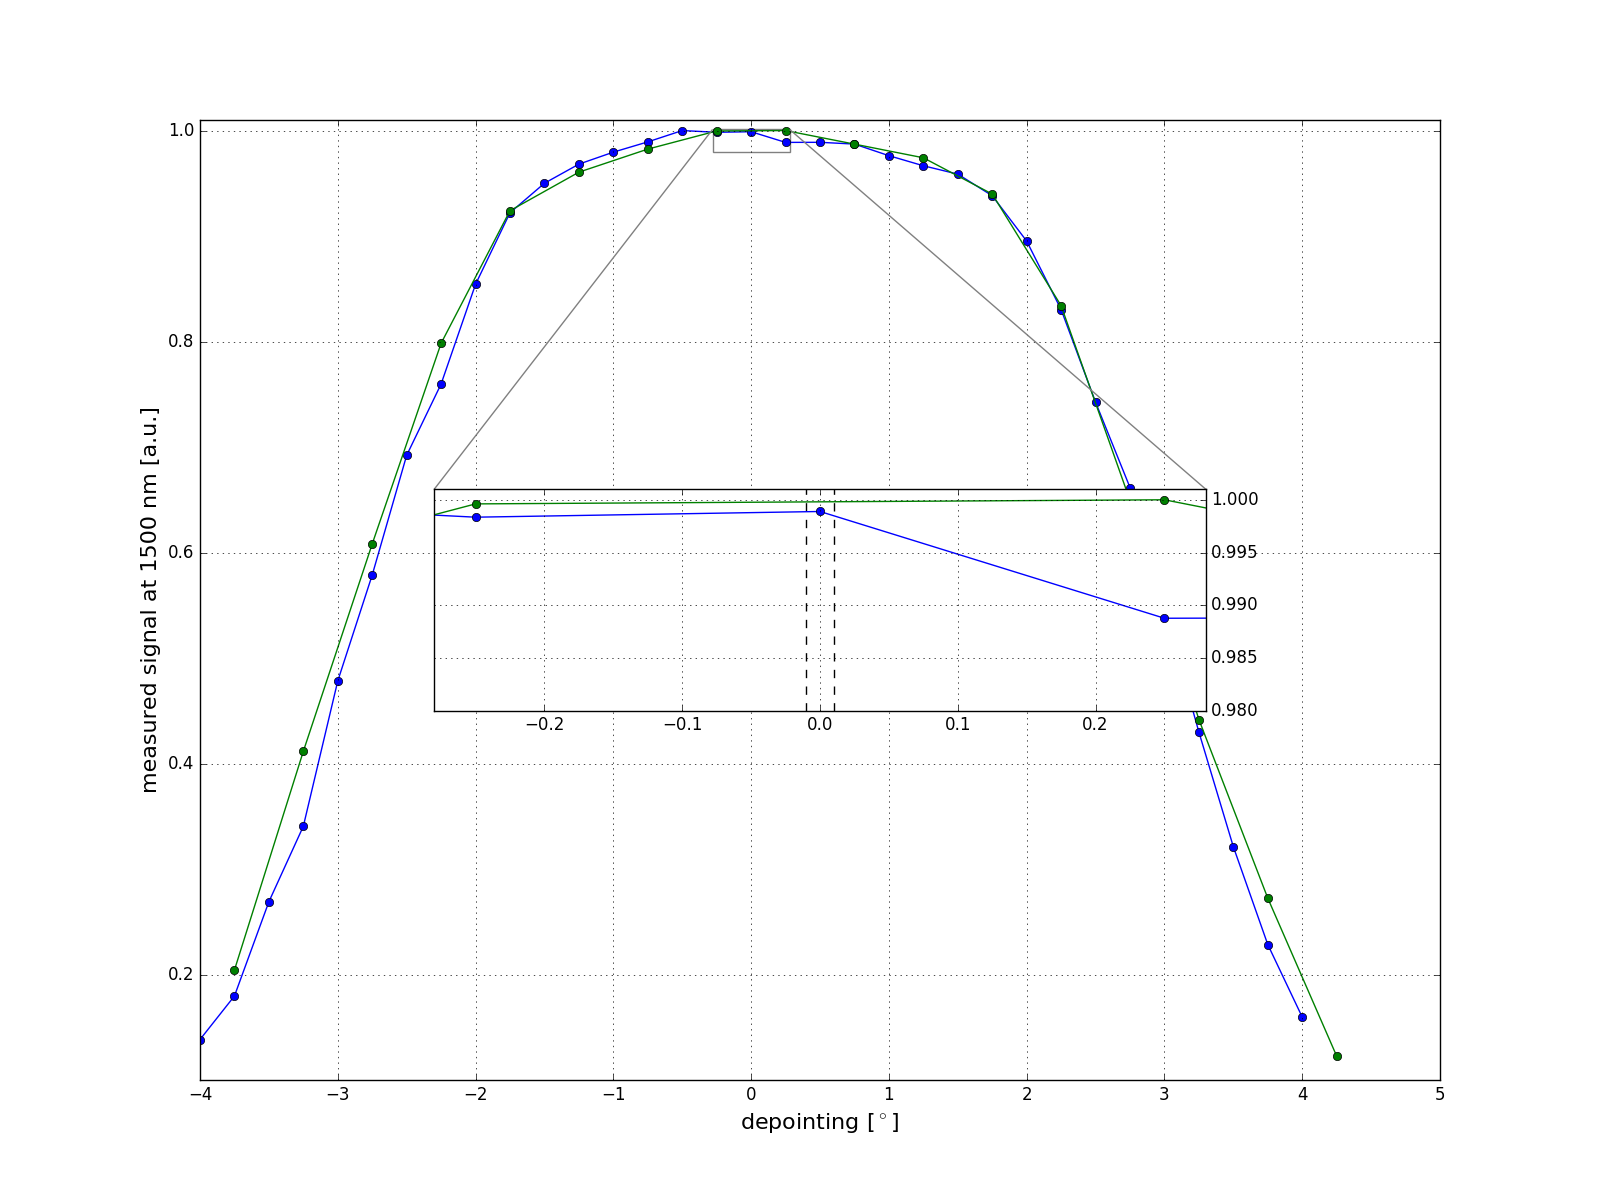

Supplement: Supplementary file 2 [file amt-11-6605-2018-supplement.zip › depointing.png]
